# Supplementary material
Source: Springer Nature journal article supplement (https://www.springermedizin.de/resource/supplementary/12985_2010_1055_MOESM2_ESM.pdf/9609046)

Panel A

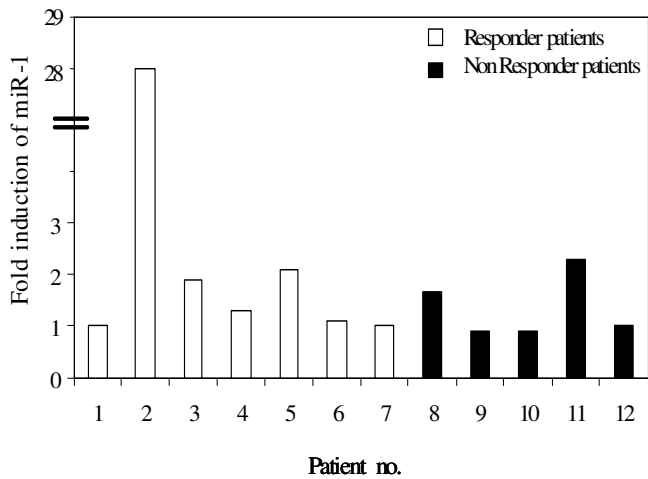

Panel B

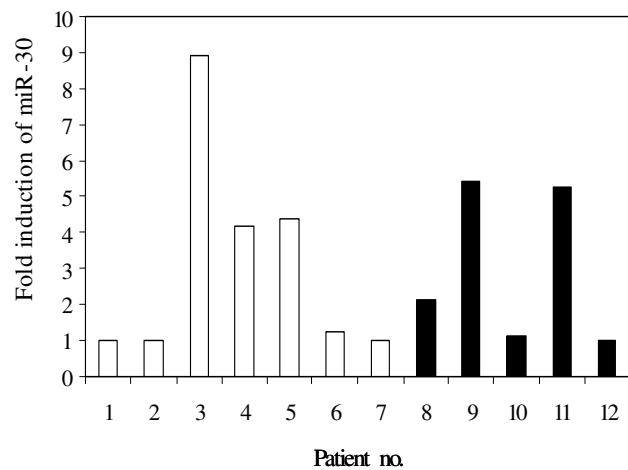

Panel C

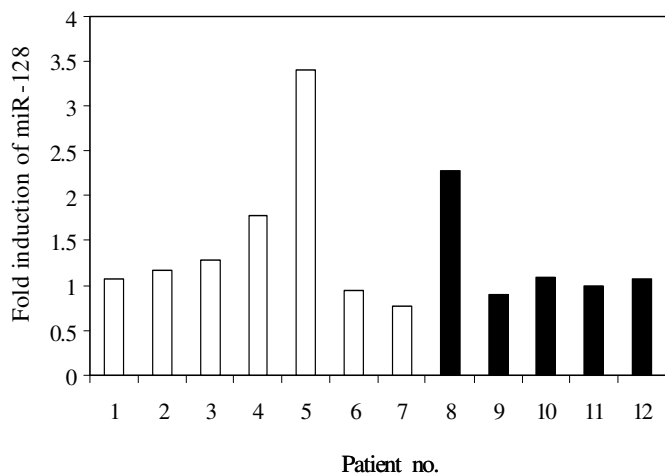

Panel D

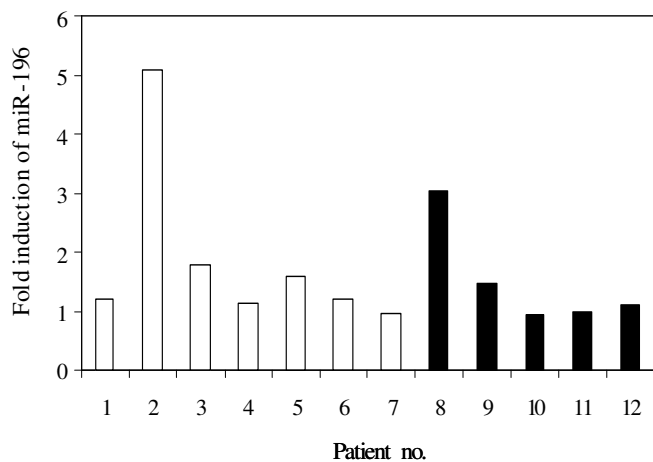

Panel E

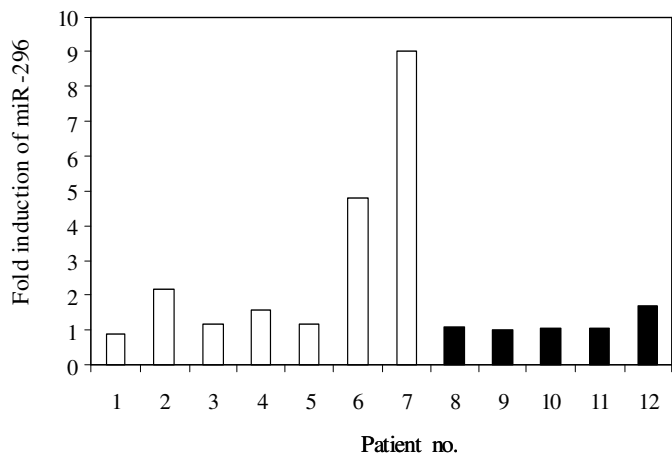

Panel F

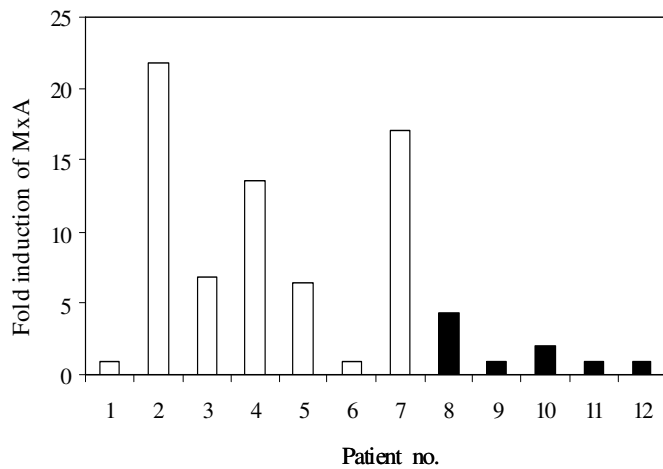

Supplement: MOESM2 [file 9609046]
